# Supplementary material for: Phenotypic variation from waterlogging in multiple perennial ryegrass varieties under climate change conditions
Source: PubMed Central journal article supplement (PMC9387306; doi:10.3389/fpls.2022.954478), 2022-08-04
Supplement: Data_Sheet_1.pdf [file Data_Sheet_1.pdf]

Supplementary Material

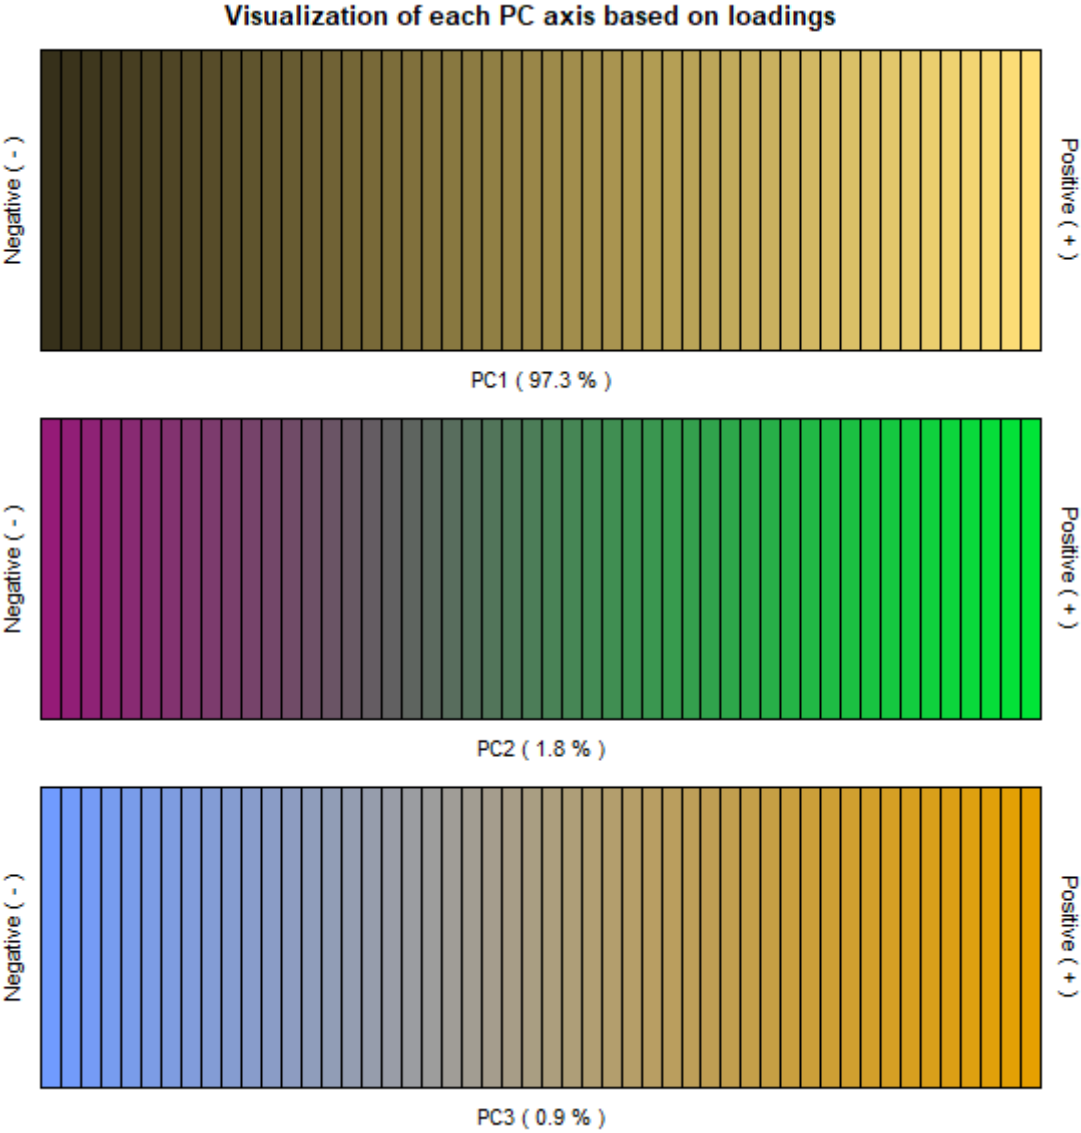

Supplementary Figure 1. Visualization of the color spectrum of each PC axis based on the loadings from each RGB hue from the image analysis.

**Supplementary Table 1**

Axes loadings and model variation of the Principal Component Analysis (PCA) isolated and modelled from the color analysis of the harvested perennial ryegrass material.

| Axis | Loadings Color Hue |       |        | Variation |              |
|------|--------------------|-------|--------|-----------|--------------|
|      | Red                | Green | Blue   | SD        | Variance (%) |
| PC1  | 0.707              | 0.621 | 0.337  | 39.222    | 97.3%        |
| PC2  | -0.570             | 0.783 | -0.248 | 5.338     | 1.8%         |
| PC3  | 0.419              | 0.016 | -0.908 | 3.761     | 0.9%         |

**Supplementary Table 2**

Mean value and standard deviation for each grouping of water status and harvests per PC axis in the Principal Component Analysis (PCA). **Abbreviation:** DAS - Days after Sowing.

| Water Status | Harvest | PC1 ( 97.3 % ) |       | PC2 ( 1.8 % ) |      | PC3 ( 0.9 % ) |      |
|--------------|---------|----------------|-------|---------------|------|---------------|------|
|              |         | Mean           | SD    | Mean          | SD   | Mean          | SD   |
| Logged       | DAS 72  | 38.67          | 14.11 | -4.98         | 7.22 | 1.30          | 3.57 |
|              | DAS 101 | 29.92          | 17.96 | 4.07          | 2.27 | 0.04          | 3.74 |
| Normal       | DAS 72  | -16.27         | 11.66 | 2.19          | 2.10 | -3.33         | 2.83 |
|              | DAS 101 | -52.32         | 9.90  | -1.28         | 1.57 | 1.99          | 2.29 |

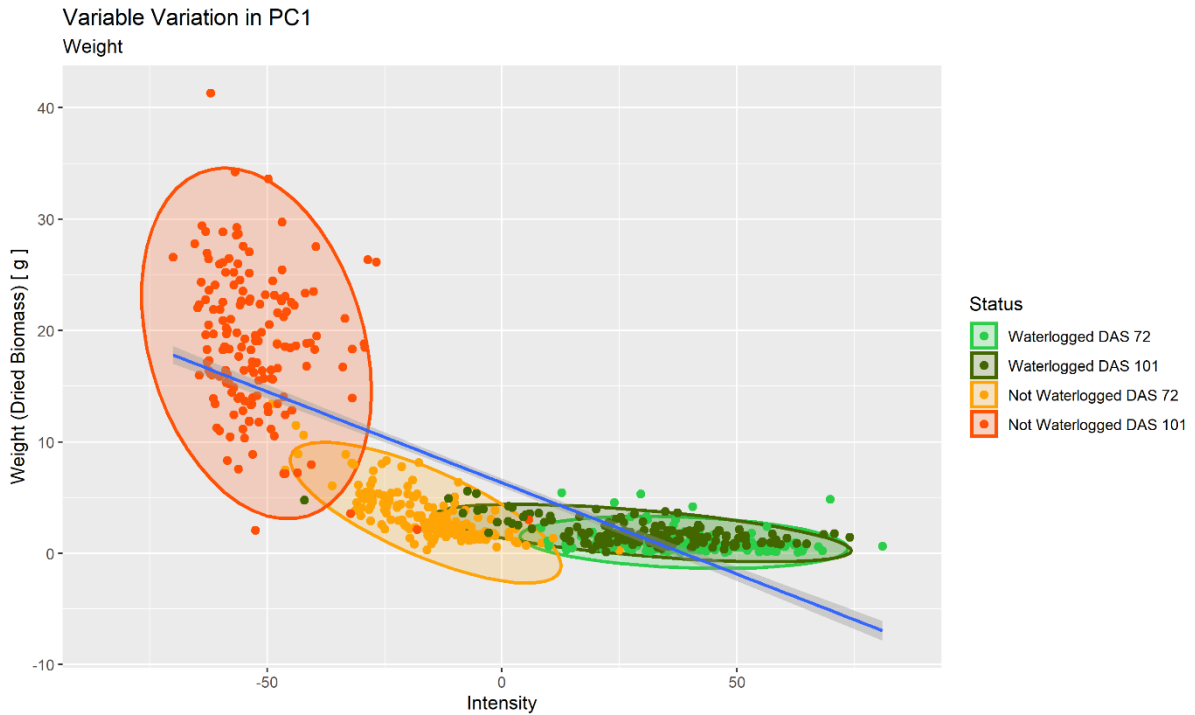

**Supplementary Figure 2.** Relationship between dried biomass and color intensity (PC1) for all harvested cores, water status and harvest (DAS 72 and 101) as identified by the image analysis. Each ellipse represents a 95% confidence ellipse for each group. The trend line is a smoother based on linear regression ( $y \sim x$ ) with 95% confidence intervals.

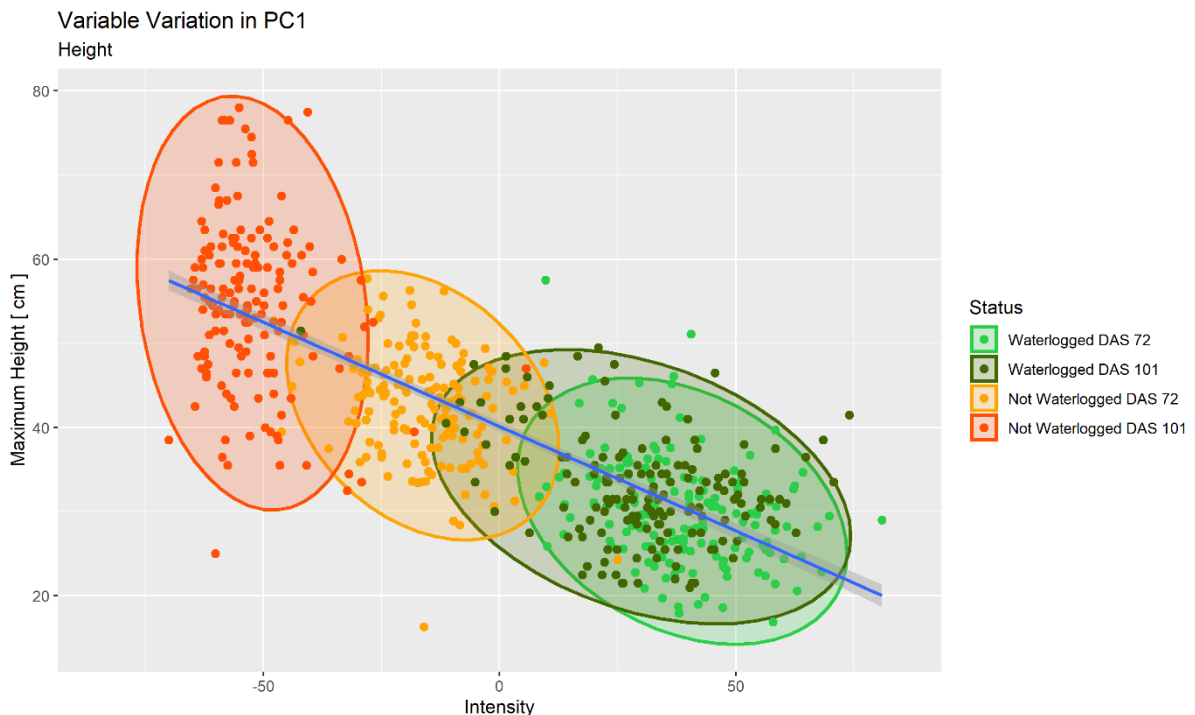

**Supplementary Figure 3.** Relationship between maximum height and color intensity (PC1) for all harvested cores, water status and harvest (DAS 72 and 101) as identified by the image analysis. Each ellipse represents a 95% confidence ellipse for each group. The trend line is a smoother based on linear regression ( $y \sim x$ ) with 95% confidence intervals.

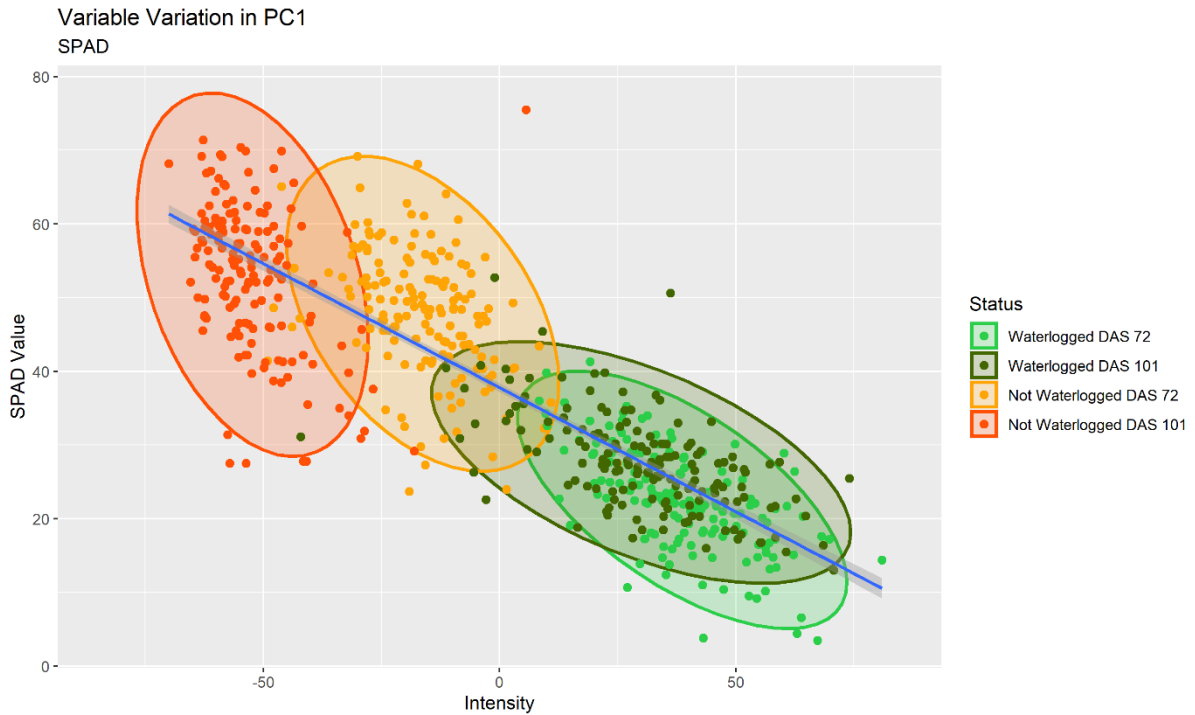

**Supplementary Figure 4.** Relationship between SPAD values and color intensity (PC1) for all harvested cores, water status and harvest (DAS 72 and 101) as identified by the image analysis. Each ellipse represents a 95% confidence ellipse for each group. The trend line is a smoother based on linear regression ( $y \sim x$ ) with 95% confidence intervals.

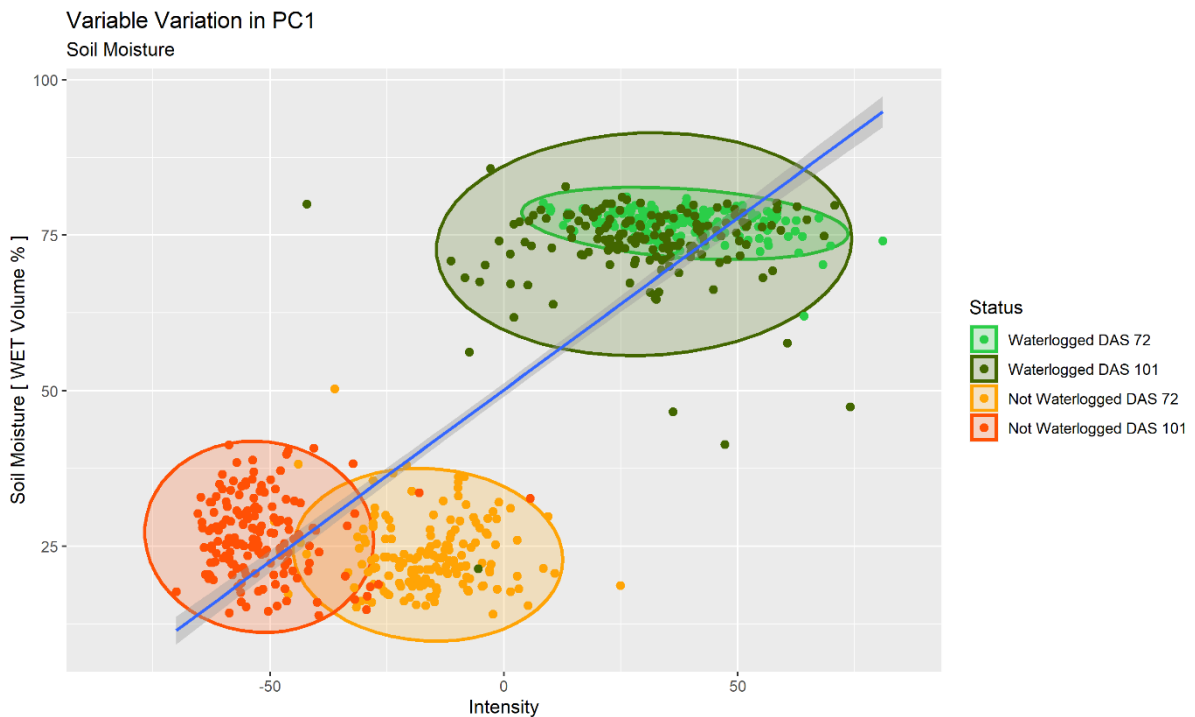

**Supplementary Figure 5.** Relationship between soil moisture and color intensity (PC1) for all harvested cores, water status and harvest (DAS 72 and 101) as identified by the image analysis. Each ellipse represents a 95% confidence ellipse for each group. The trend line is a smoother based on linear regression ( $y \sim x$ ) with 95% confidence intervals.

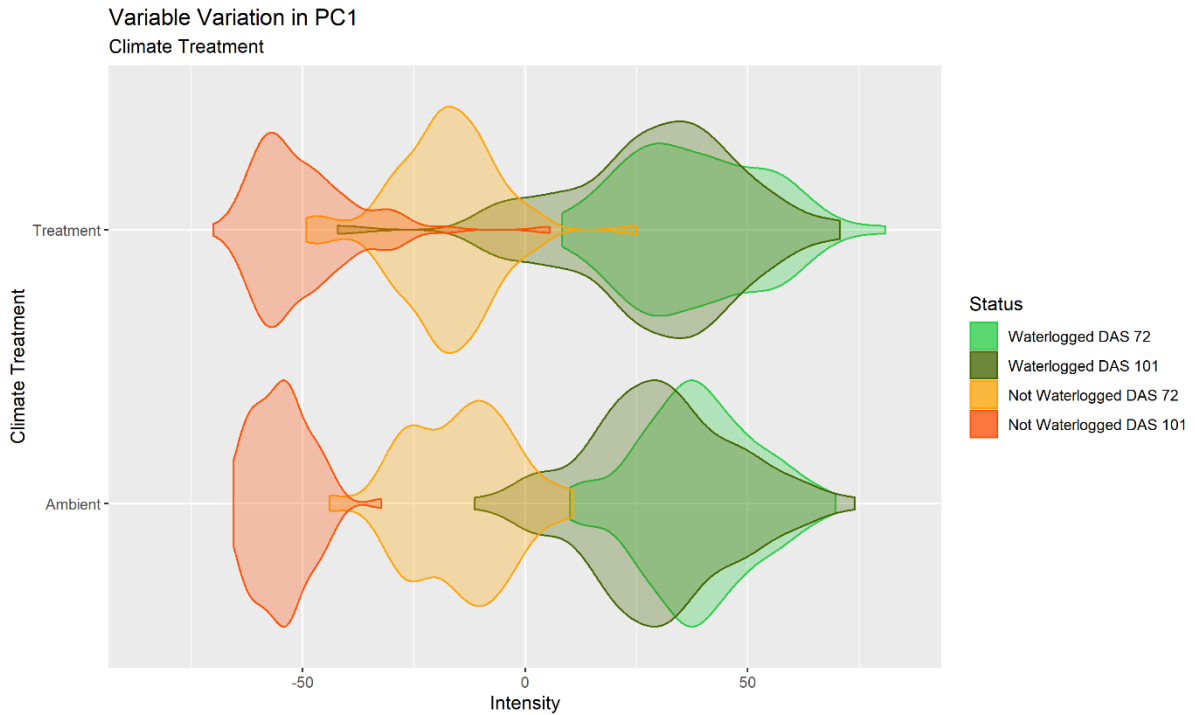

**Supplementary Figure 6.** Violin graphs describing the relationship between climate treatment and color intensity (PC1) for all harvested cores, water status and harvest (DAS 72 and 101) as identified by the image analysis.

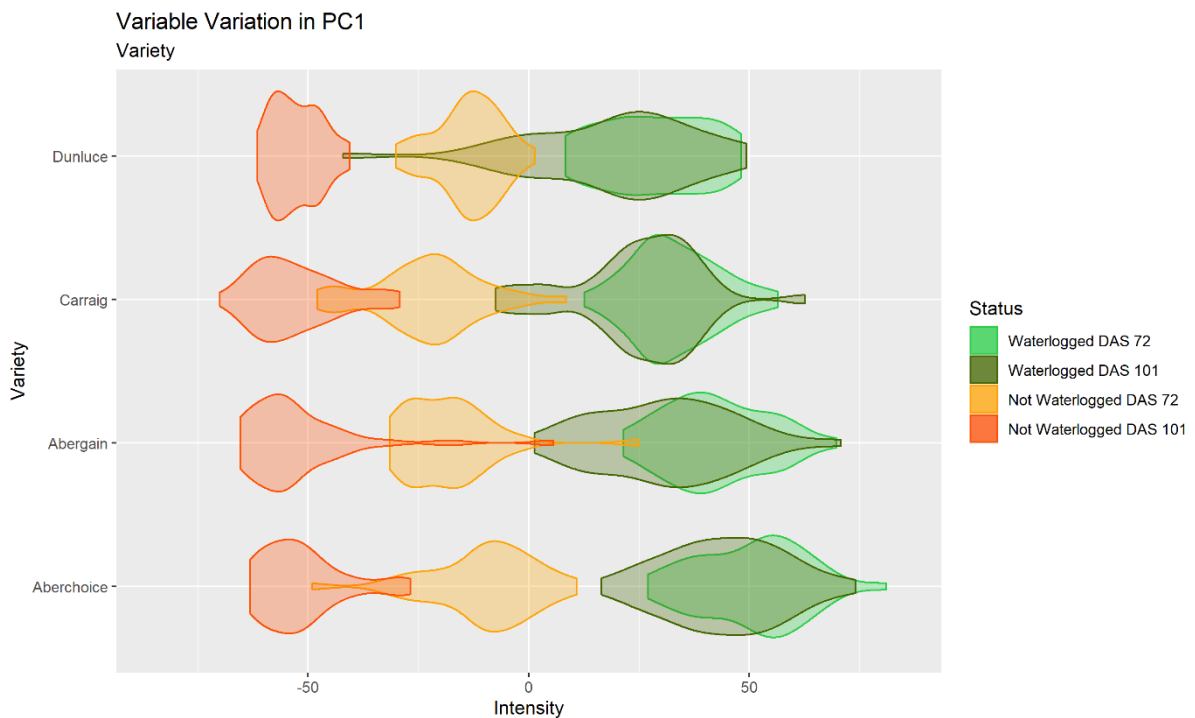

**Supplementary Figure 7.** Violin graphs describing the relationship between varieties and color intensity (PC1) for all harvested cores, water status and harvest (DAS 72 and 101) as identified by the image analysis.

**Supplementary Table 3**

Model statistics for the variables in the linear regression model in regard to the first PCA axis.

**Intercept:** Treatment - Ambient, **Variety** - Aberchoice, **Harvest** - DAS 101. Extension of **Table 4**.

**Abbreviation:** DAS - Days after Sowing

| Variable      |                        | Model Statistics |            |           |
|---------------|------------------------|------------------|------------|-----------|
| Main variable | Sub-factor             | Estimate         | Std. Error | t - value |
| Intercept     |                        | 42.540           | 4.385      | 9.701     |
| Weight        |                        | -1.481           | 0.097      | -15.246   |
| Height        |                        | -0.483           | 0.063      | -7.611    |
| SPAD          |                        | -0.850           | 0.054      | -15.812   |
| Soil Moisture |                        | 0.446            | 0.034      | 13.216    |
| Treatment     | eCO <sub>2</sub> + 2°C | 3.980            | 0.908      | 4.382     |
| Variety       | Abergain               | -6.793           | 1.273      | -5.336    |
|               | Carraig                | -11.429          | 1.288      | -8.877    |
|               | Dunluce                | -10.805          | 1.297      | -8.329    |
| Harvest       | DAS 72                 | 2.377            | 1.151      | 2.065     |
